# Supplementary material
Source: PubMed Central journal article supplement (PMC4023154)
Supplement: npp20142x4.pdf [file npp20142x4.pdf]

**Supplemental Table S1.** Comparison of the effects of VU0152100, clozapine, and haloperidol on Fos expression in the forebrain and lateral hypothalamus

| <b>Forebrain</b> |                         |                                                               |                          |                  |                                           |
|------------------|-------------------------|---------------------------------------------------------------|--------------------------|------------------|-------------------------------------------|
| <b>Treatment</b> | <b>Dose<br/>(mg/kg)</b> | <b>Number of Fos-like immunoreactive cells/mm<sup>2</sup></b> |                          |                  |                                           |
|                  |                         | <b>Prefrontal cortex<br/>(medial)</b>                         | <b>Nucleus accumbens</b> |                  | <b>Caudate-putamen<br/>(dorsolateral)</b> |
|                  |                         |                                                               | <b>(shell)</b>           | <b>(core)</b>    |                                           |
| Vehicle          |                         | 217.4 ± 24.5                                                  | 90.0 ± 13.1              | 46.7 ± 9.4       | 5.0 ± 2.0                                 |
| VU0152100        | 30                      | 200.6 ± 31.6                                                  | 75.0 ± 14.9              | 31.3 ± 13.4      | 1.6 ± 1.6                                 |
| VU0152100        | 100                     | 220.7 ± 27.2                                                  | 110.8 ± 14.6             | 30.8 ± 8.3       | 2.5 ± 1.3                                 |
| Clozapine        | 30                      | 556.6 ± 134.9 **                                              | 367.2 ± 43.8 ***         | 243.8 ± 81.0     | 220.3 ± 49.2 **                           |
| Haloperidol      | 1                       | 392.1 ± 59.4 *                                                | 505.4 ± 97.7 ***         | 610.7 ± 137.3 ** | 1143.0 ± 93.0 ***                         |

  

| <b>Lateral Hypothalamus</b> |     |                                              |                   |                                         |                   |
|-----------------------------|-----|----------------------------------------------|-------------------|-----------------------------------------|-------------------|
|                             |     | <b>Number of Fos-li cells/mm<sup>2</sup></b> |                   | <b>% orexin cells expressing Fos-LI</b> |                   |
|                             |     | <b>Medial LH</b>                             | <b>Lateral LH</b> | <b>Medial LH</b>                        | <b>Lateral LH</b> |
| Vehicle                     |     | 20.8 ± 3.0                                   | 13.7 ± 2.8        | 1.4 ± 0.4                               | 1.3 ± 0.3         |
| VU0152100                   | 30  | 34.4 ± 7.2                                   | 12.5 ± 4.5        | 2.8 ± 0.9                               | 0.9 ± 0.4         |
| VU0152100                   | 100 | 30.6 ± 6.6                                   | 16.3 ± 4.1        | 1.9 ± 0.3                               | 0.6 ± 0.2         |
| Clozapine                   | 30  | 79.2 ± 14.4 **                               | 39.6 ± 6.5 *      | 12.7 ± 2.6 ***                          | 10.1 ± 2.1 **     |
| Haloperidol                 | 1   | 44.1 ± 7.5                                   | 33.4 ± 9.6        | 3.2 ± 1.1                               | 4.0 ± 1.2         |

The effects of VU0152100 (30 and 100 mg/kg, ip) or vehicle on the number of Fos-li cells/mm<sup>2</sup> (**Top**) and the percentage of orexin cells expressing Fos-LI (**Bottom**) was compared to haloperidol (1 mg/kg, sc) and clozapine (30 mg/kg, sc). Data represent means ± S.E.M. of 6 – 15 animals per treatment. \* p < 0.05, \*\* p < 0.01, \*\*\* p < 0.001 vs. vehicle (Dunn's test).
