# Supplementary material
Source: PubMed Central journal article supplement (PMC4023154)
Supplement: npp20142x5.pdf [file npp20142x5.pdf]

**Supplemental Table S2.** Adverse side effect profiling of VU0152100 using the Modified Irwin Neurological Test Battery

|                                        | <i>Vehicle</i> |           |           |            |            | <i>1 mg/kg Oxotremorine</i> |           |           |            |            | <i>56.6 mg/kg VU0152100</i> |           |           |            |            |
|----------------------------------------|----------------|-----------|-----------|------------|------------|-----------------------------|-----------|-----------|------------|------------|-----------------------------|-----------|-----------|------------|------------|
| <i>Time</i>                            | <i>5</i>       | <i>15</i> | <i>60</i> | <i>120</i> | <i>240</i> | <i>5</i>                    | <i>15</i> | <i>60</i> | <i>120</i> | <i>240</i> | <i>5</i>                    | <i>15</i> | <i>60</i> | <i>120</i> | <i>240</i> |
| <b><i>Autonomic nervous system</i></b> |                |           |           |            |            |                             |           |           |            |            |                             |           |           |            |            |
| <i>Ptosis</i>                          | -              | -         | -         | -          | -          | -                           | -         | -         | -          | -          | -                           | -         | -         | -          | -          |
| <i>Exopthalmus</i>                     | -              | -         | -         | -          | -          | ++ **                       | ++ **     | -         | -          | -          | -                           | -         | -         | -          | -          |
| <i>Miosis</i>                          | ++             | ++++      | +++       | +++        | +++        | - **                        | - **      | - **      | - **       | - **       | ++                          | ++ **     | (+)       | ++         | ++         |
| <i>Mydriasis</i>                       | -              | -         | -         | -          | -          | ++++ **                     | +++ **    | ++ **     | -          | -          | -                           | (+)       | (+)       | -          | -          |
| <i>Corneal reflex loss</i>             | -              | -         | -         | -          | -          | (+)                         | -         | -         | -          | -          | -                           | -         | -         | -          | -          |
| <i>Pinna reflex loss</i>               | -              | -         | -         | -          | (+)        | ++                          | ++ **     | (+)       | -          | -          | -                           | -         | -         | -          | -          |
| <i>Piloerection</i>                    | -              | -         | -         | -          | -          | +++ **                      | ++ **     | (+)       | -          | -          | -                           | -         | -         | -          | -          |
| <i>Respiratory rate</i>                | -              | -         | -         | -          | -          | ++ **                       | (+)       | (+)       | -          | -          | -                           | -         | -         | -          | -          |
| <i>Writhing</i>                        | -              | -         | -         | -          | -          | -                           | -         | -         | -          | -          | -                           | -         | -         | -          | -          |
| <i>Tail erection</i>                   | -              | -         | -         | -          | -          | -                           | -         | -         | -          | -          | -                           | -         | -         | -          | -          |
| <i>Lacrimation</i>                     | -              | -         | -         | -          | -          | +++ **                      | ++ **     | -         | -          | -          | -                           | -         | -         | -          | -          |
| <i>Salivation</i>                      | -              | -         | -         | -          | -          | +++ **                      | ++ **     | -         | -          | -          | -                           | -         | -         | -          | -          |
| <i>Vasodilation</i>                    | -              | -         | -         | -          | -          | -                           | -         | -         | -          | -          | -                           | -         | -         | -          | -          |
| <i>Skin colour</i>                     | -              | -         | -         | -          | -          | + **                        | -         | -         | -          | -          | -                           | -         | -         | -          | -          |
| <i>Irritability</i>                    | (+)            | -         | -         | (+)        | (+)        | +++ **                      | ++ **     | ++ **     | +          | (+)        | -                           | -         | -         | -          | -          |
| <i>Rectal temp. (°C)</i>               | 36.5           | 36.9      | 37.0      | 36.9       | 36.9       | 35.7                        | 35.5 **   | 36.0 *    | 36.7       | 36.9       | 37.1                        | 37.2      | 37.0      | 37.3       | 36.7       |
| <b><i>Somatomotor systems</i></b>      |                |           |           |            |            |                             |           |           |            |            |                             |           |           |            |            |
| <i>Motor activity</i>                  | -              | -         | -         | -          | -          | ++++ **                     | ++++ **   | +++ **    | + **       | (+)        | -                           | -         | -         | -          | -          |
| <i>Convulsions</i>                     | -              | -         | -         | -          | -          | -                           | -         | -         | -          | -          | -                           | -         | -         | -          | -          |
| <i>Arch/roll</i>                       | -              | -         | -         | -          | -          | -                           | -         | -         | -          | -          | -                           | -         | -         | -          | -          |
| <i>Tremors</i>                         | -              | -         | -         | -          | -          | ++ **                       | (+)       | (+)       | -          | -          | -                           | -         | -         | -          | -          |
| <i>Leg weakness</i>                    | -              | -         | -         | -          | -          | ++++ **                     | ++++ **   | +++ **    | ++ **      | (+)        | -                           | -         | -         | -          | -          |
| <i>Rigid stance</i>                    | -              | -         | -         | -          | -          | -                           | -         | -         | -          | -          | -                           | -         | -         | -          | -          |
| <i>Spraddle</i>                        | -              | -         | -         | -          | -          | ++++ **                     | +++ **    | +         | -          | -          | -                           | -         | -         | -          | -          |
| <i>Placing loss</i>                    | -              | -         | -         | -          | -          | (+)                         | -         | -         | -          | -          | -                           | -         | -         | -          | -          |
| <i>Grasping loss</i>                   | -              | -         | -         | -          | -          | -                           | -         | -         | -          | -          | -                           | -         | -         | -          | -          |
| <i>Righting loss</i>                   | -              | -         | -         | -          | -          | -                           | -         | -         | -          | -          | -                           | -         | -         | -          | -          |
| <i>Catalepsy</i>                       | -              | -         | -         | -          | -          | -                           | -         | -         | -          | -          | -                           | -         | -         | -          | -          |
| <i>Tail pinch</i>                      | -              | -         | -         | -          | -          | ++++ **                     | ++++ **   | ++++ **   | -          | -          | -                           | -         | -         | -          | -          |
| <i>Escape loss</i>                     | -              | -         | -         | -          | -          | ++++ **                     | ++++ **   | ++ **     | (+)        | -          | -                           | -         | -         | -          | -          |

The effects of VU0152100 (56.6 mg/kg, ip) or vehicle (10 % Tween 80) on autonomic nervous system and somatomotor function were compared to oxotremorine (1 mg/kg, sc). The mean scores of five animals per treatment are classified as follows: -, = no effect; (+), 0.01 – 0.25; +, 0.251 – 0.50; ++, 0.51 – 1.0; +++, 1.01 – 1.50; +++++, 1.51 – 2.0; \* p<0.05, \*\* p<0.01 vs. Vehicle (Dunnett's test)
